# Supplementary material for: Red emitting [Ir(C^N)2(N^N)]+complexes employing bidentate 2,2′:6′,2′′-terpyridine ligands for light-emitting electrochemical cells
Source: Royal Society of Chemistry journal article supplement (doi:10.1039/c3dt53477d), 2014-01-01
Supplement: c3dt53477d.pdf [file c3dt53477d.pdf]

ESI to accompany:

## Red emitting $[\text{Ir}(\text{C}^{\wedge}\text{N})_2(\text{N}^{\wedge}\text{N})]^+$ complexes employing bidentate 2,2':6,2''-terpyridine ligands for light-emitting electrochemical cells

Edwin. C. Constable,<sup>a</sup> Catherine E. Housecroft,<sup>a\*</sup> Gabriel E. Schneider,<sup>a</sup> Jennifer A. Zampese,<sup>a</sup> Henk J. Bolink,<sup>\*b,c</sup> Antonio Pertegás<sup>b</sup> and Cristina Roldan-Carmona<sup>b</sup>

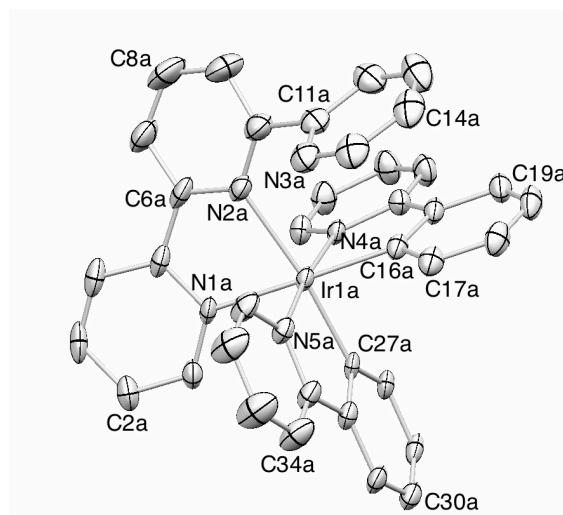

Fig. S1. Structure of one of two independent  $[\text{Ir}(\text{ppy})_2(\text{tpy})]^+$  cations in  $4\{[\text{Ir}(\text{ppy})_2(\text{tpy})][\text{PF}_6]\} \cdot 2.5\text{Et}_2\text{O} \cdot 1.5\text{MeCN} \cdot 3\text{H}_2\text{O}$ . Ellipsoids plotted at 30% probability level; H atoms omitted. Selected bond lengths: Ir1a–N1a = 2.130(5), Ir1a–N2a = 2.214(5), Ir1a–C27a = 1.994(6), Ir1a–C16a = 2.018(6), Ir1a–N5a = 2.042(5), Ir1a–N4a = 2.049(5) Å.

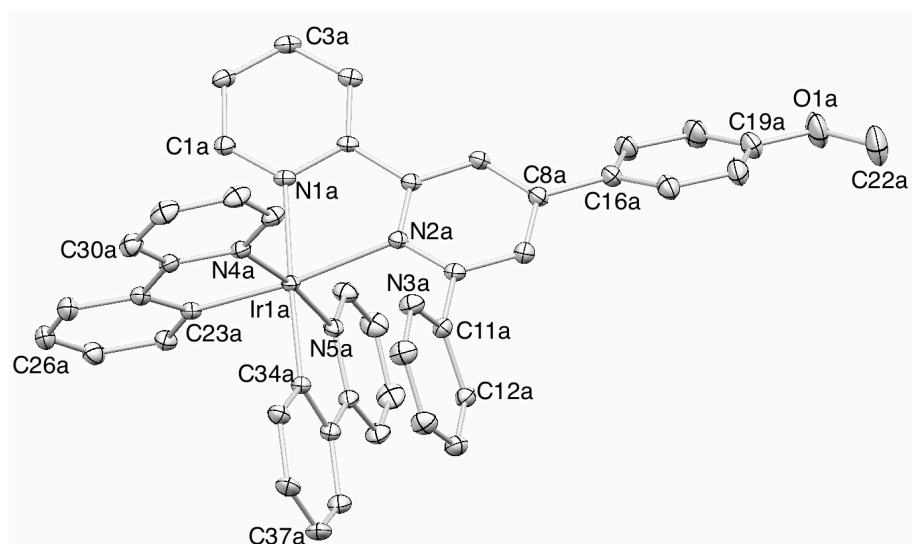

Fig. S2. Structure of one of two independent  $[\text{Ir}(\text{ppy})_2(\mathbf{2})]^+$  cations in  $4\{[\text{Ir}(\text{ppy})_2(\mathbf{2})][\text{PF}_6]\} \cdot \text{Et}_2\text{O} \cdot 2\text{MeCN}$ . Ellipsoids plotted at 30% probability level; H atoms omitted. Selected bond lengths: Ir1a–C23a = 1.996(3), Ir1a–C34a = 2.015(3), Ir1a–N4a = 2.039(2), Ir1a–N5a = 2.058(2), Ir1a–N1a = 2.122(2), Ir1a–N2a = 2.206(2) Å.

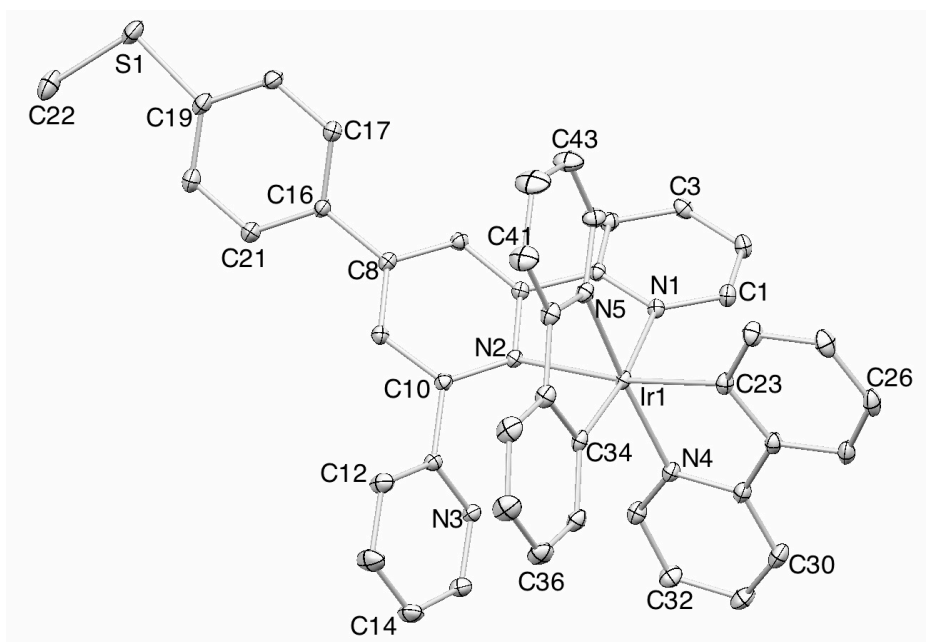

Fig. S3. Structure of the  $[\text{Ir}(\text{ppy})_2(\mathbf{3})]^+$  cation in  $2\{[\text{Ir}(\text{ppy})_2(\mathbf{3})][\text{PF}_6]\} \cdot \text{MeCN} \cdot \text{H}_2\text{O}$  with ellipsoids plotted at 30% probability level; H atoms omitted. Selected bond lengths: Ir1–C23 = 2.0037(12), Ir1–C34 = 2.0140(14), Ir1–N5 = 2.0504(12), Ir1–N4 = 2.0533(11), Ir1–N1 = 2.1291(11), Ir1–N2 = 2.2300(10) Å.

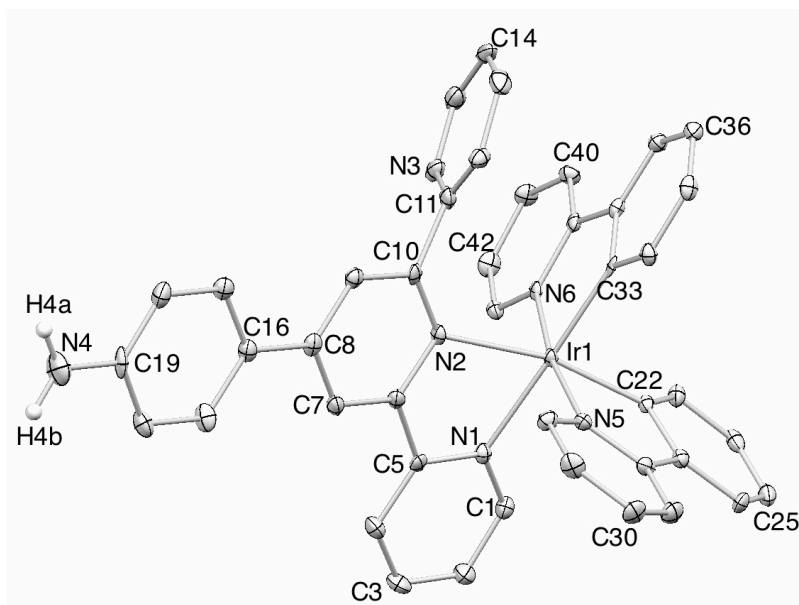

Fig. S4. Structure of the  $[\text{Ir}(\text{ppy})_2(\mathbf{4})]^+$  cation in  $[\text{Ir}(\text{ppy})_2(\mathbf{4})][\text{PF}_6] \cdot 2\text{CH}_2\text{Cl}_2$  with ellipsoids plotted at 30% probability level; H atoms except those in the  $\text{NH}_2$  unit are omitted. Selected bond lengths: Ir1–C33 = 2.012(5), Ir1–C22 = 2.013(5), Ir1–N6 = 2.039(4), Ir1–N5 = 2.057(4), Ir1–N1 = 2.153(4), Ir1–N2 = 2.204(4) Å.

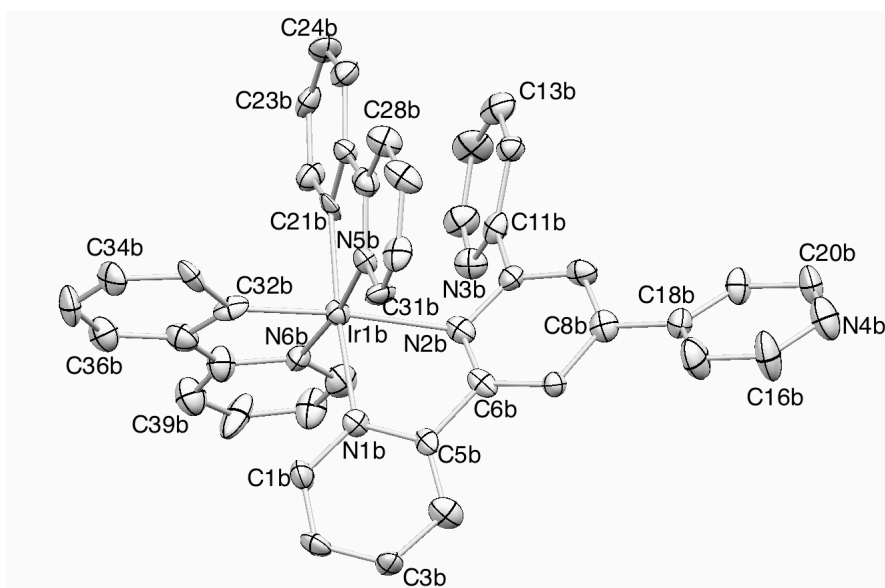

Fig. S5. Structure of one of two independent  $[\text{Ir}(\text{ppy})_2(\text{pytpy})]^+$  cations in  $2\{[\text{Ir}(\text{ppy})_2(\text{pytpy})][\text{PF}_6]\} \cdot \text{Et}_2\text{O} \cdot \text{CH}_2\text{Cl}_2$ . Ellipsoids plotted at 30% probability level and H atoms omitted. Selected bond lengths: Ir1b–C32b = 1.929(17), Ir1b–C21b = 1.978(15), Ir1b–N5b = 2.034(13), Ir1b–N6b = 2.043(13), Ir1b–N1b = 2.115(12), Ir1b–N2b = 2.214(14) Å.

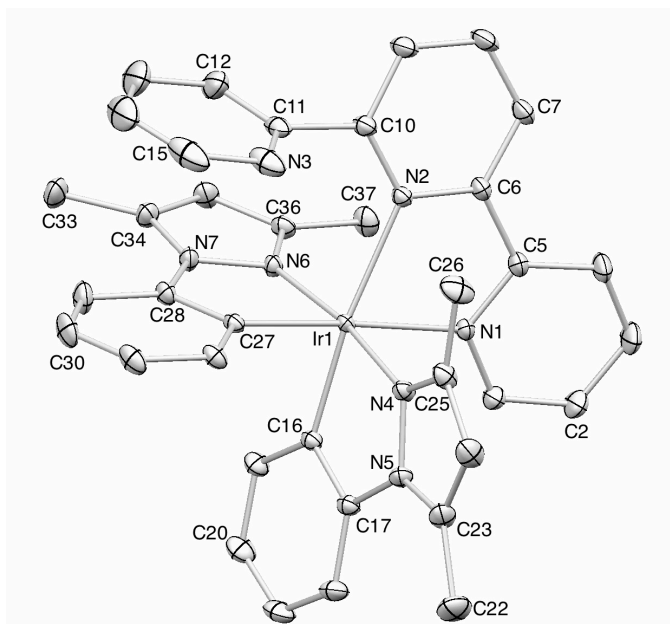

Fig. S6. Structure of the  $[\text{Ir}(\text{dmppz})_2(\text{tpy})]^+$  cation in  $[\text{Ir}(\text{dmppz})_2(\text{tpy})][\text{PF}_6]$  with ellipsoids plotted at 30% probability level and H atoms omitted. Selected bond lengths: Ir1–C16 = 2.0030(19), Ir1–C27 = 2.011(2), Ir1–N6 = 2.0250(17), Ir1–N4 = 2.0281(18), Ir1–N1 = 2.1402(17), Ir1–N2 = 2.2212(17) Å.

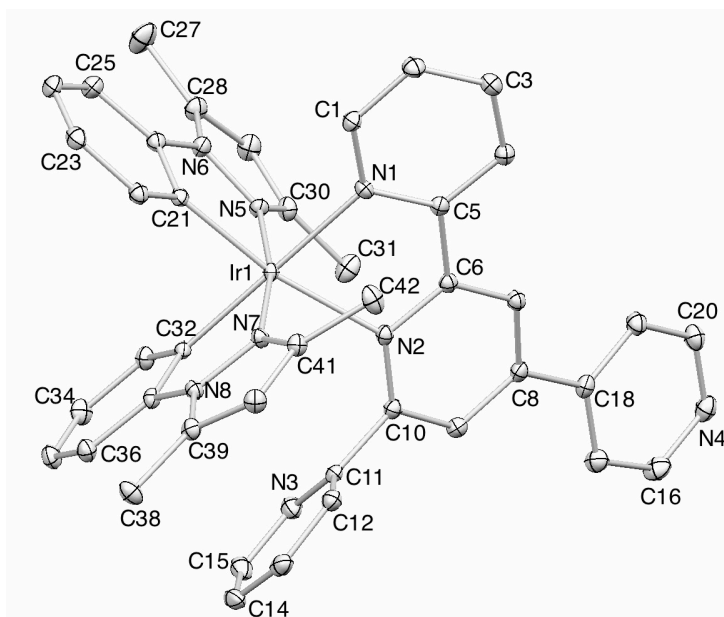

Fig. S7. Structure of the  $[\text{Ir}(\text{dmppz})_2(\text{pytpy})]^+$  cation in  $[\text{Ir}(\text{dmppz})_2(\text{pytpy})][\text{PF}_6]\cdot\text{CH}_2\text{Cl}_2$ ; ellipsoids plotted at 30% probability level and H atoms omitted. Selected bond lengths: Ir1–C21 = 2.008(3), Ir1–C32 = 2.015(2), Ir1–N7 = 2.031(2), Ir1–N5 = 2.051(2), Ir1–N1 = 2.134(2), Ir1–N2 = 2.206(2) Å.

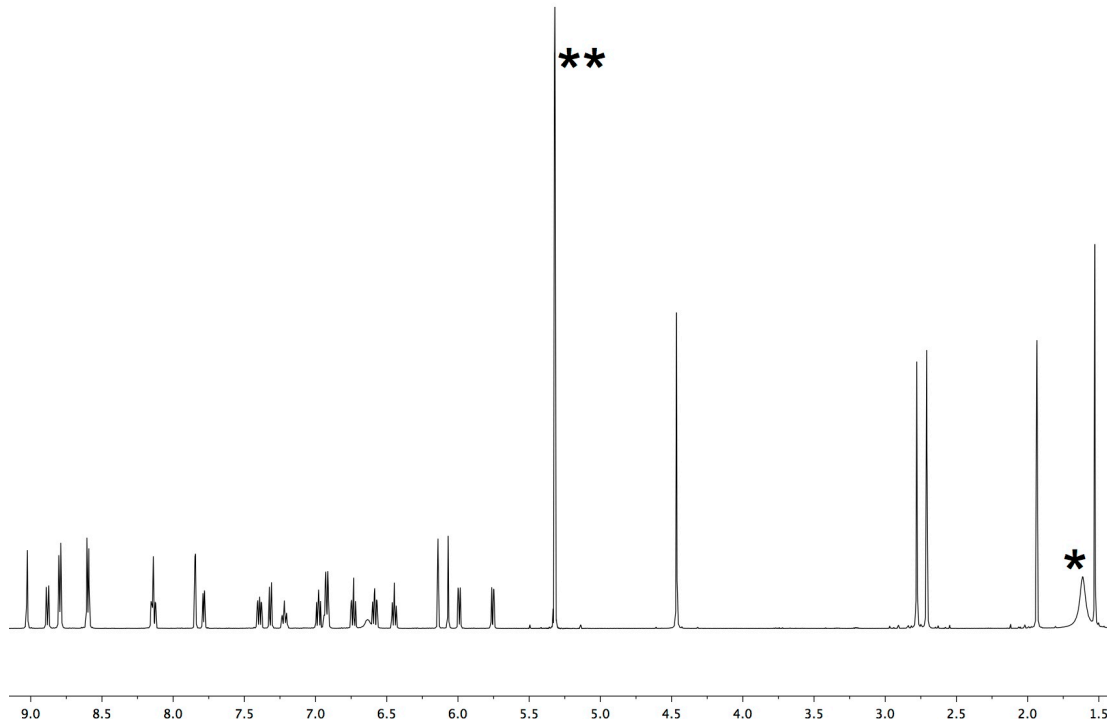

Fig. S8 500 MHz  $^1\text{H}$  NMR spectrum of  $[\text{Ir}(\text{dmppz})_2(\text{Mepytpy})][\text{PF}_6]_2$  ( $\text{CDCl}_3$ , 295 K). Peaks marked \*\* and \* are residual  $\text{CHCl}_3$  and  $\text{H}_2\text{O}$  respectively.

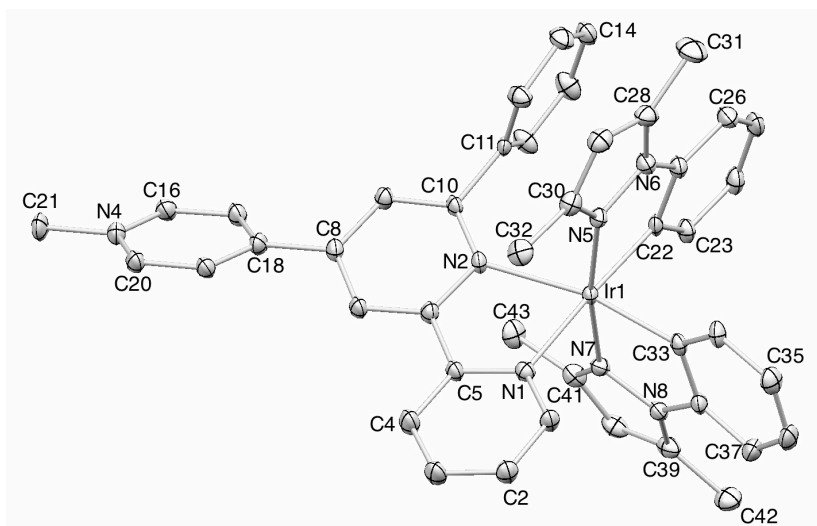

Fig. S9. Structure of the  $[\text{Ir}(\text{dmppz})_2(\text{Mepytpy})]^{2+}$  cation in  $[\text{Ir}(\text{dmppz})_2(\text{Mepytpy})][\text{PF}_6]_2 \cdot 2\text{CH}_2\text{Cl}_2$ ; ellipsoids plotted at 30% probability level and H atoms omitted. Selected bond lengths: Ir1–C33 1.991(5), Ir1–N5 = 2.018(5), Ir1–C22 = 2.024(5), Ir1–N7 = 2.044(4), Ir1–N1 = 2.152(4), Ir1–N2 = 2.214(4) Å.

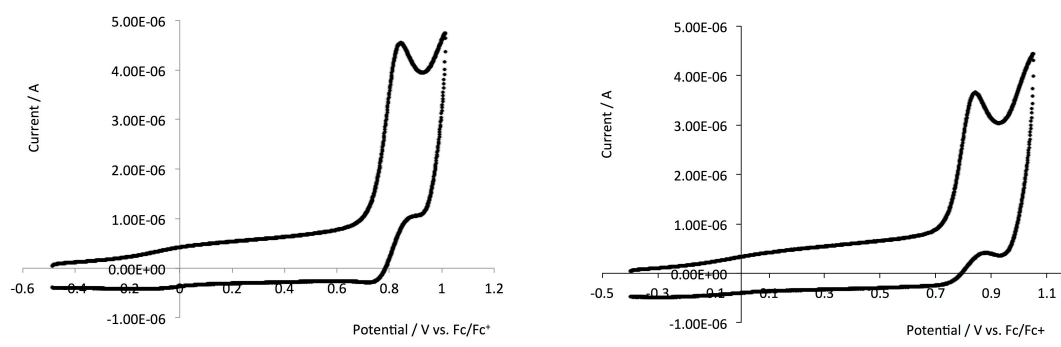

(a) (b)  
Fig. S10 Sweep to positive potential in the cyclic voltammograms of (a)  $[\text{Ir}(\text{ppy})_2(\mathbf{2})][\text{PF}_6]$  and (b)  $[\text{Ir}(\text{dmppz})_2(\text{tpy})][\text{PF}_6]$  (with respect to  $\text{Fc}/\text{Fc}^+$ ;  $\text{CH}_2\text{Cl}_2$  solution) showing the quasi-reversible process.

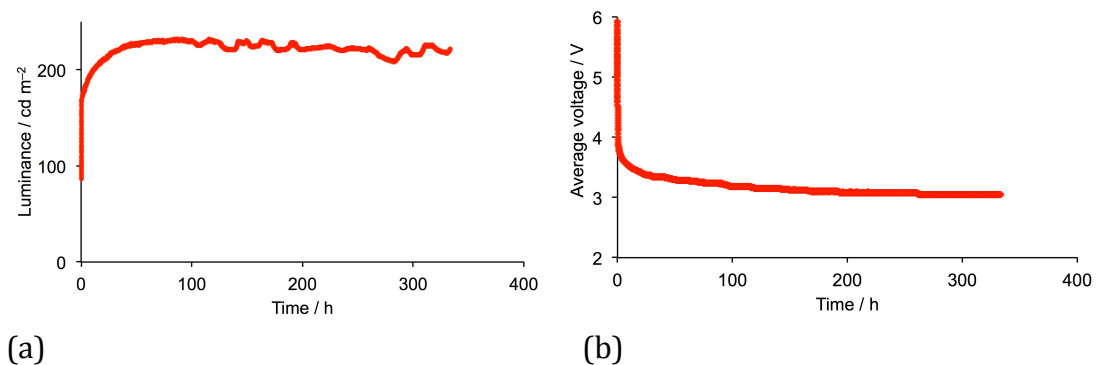

Fig S11. The device performance of the  $[\text{Ir}(\text{ppy})_2(6\text{-Phbpy})][\text{PF}_6]$  under the pulsed driving conditions, analogous to those used for the best performing devices in this paper. (a) Luminance, and (b) average voltage versus time.

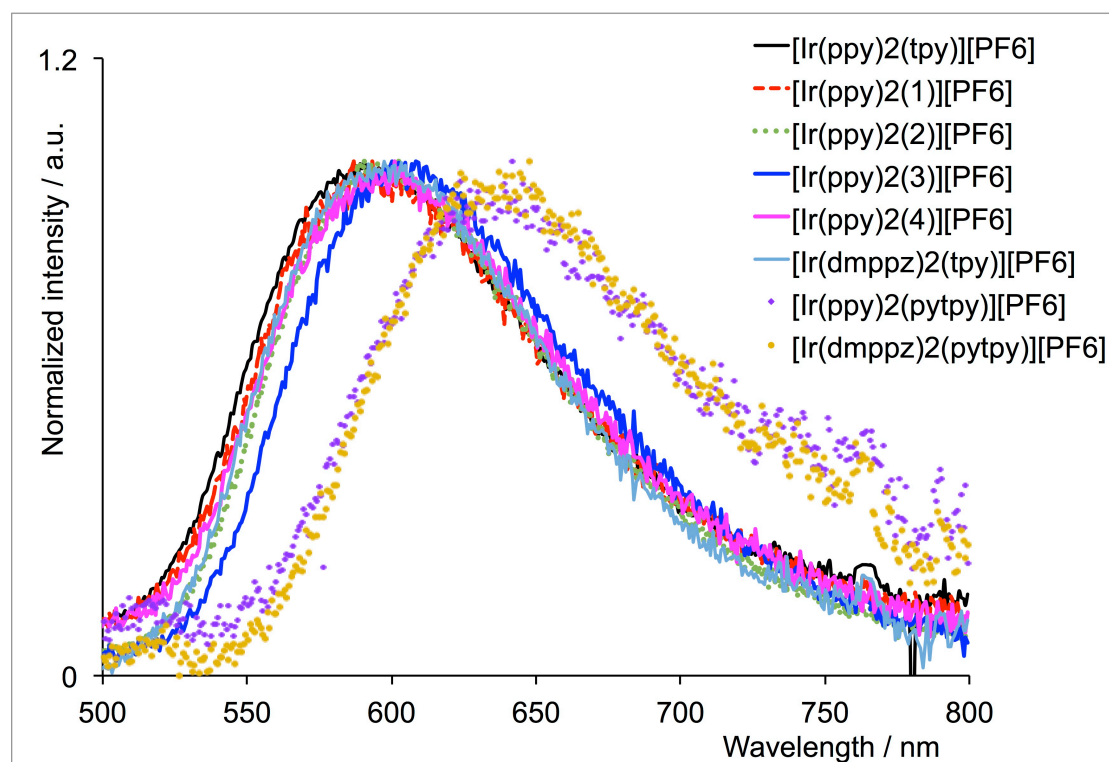

Fig. S12. Photoluminescence spectra in thin films (iTMC:IL 4:1).
